# Supplementary material
Source: HighWire-hosted journal article supplement (https://bmjopen.bmj.com/content/8/1/e017959)
Supplement: inline-supplementary-material-1 [file inline-supplementary-material-1.pdf]

## MEDLINE SEARCH STRATEGY

1. cancer\*.mp.
2. exp Neoplasms/
3. tumo?r\*.mp.
4. malignan\*.mp.
5. exp Adenocarcinoma/
6. exp Leukemia/
7. leukaemia\*.mp.
8. metastat\*.mp.
9. exp Carcinoma/
10. exp Medical Oncology/
11. exp Sarcoma/
12. choriocarcinoma\*.mp.
13. lymphoma\*.mp.
14. teratoma\*.mp.
15. 1 or 2 or 3 or 4 or 5 or 6 or 7 or 8 or 9 or 10 or 11 or 12 or 13 or 14
16. screen\*.mp.
17. measure\*.mp.
18. assess\*.mp.
19. Questionnaires/
20. Diagnosis/
21. instrument.mp.
22. validat\*.mp.
23. 16 or 17 or 18 or 19 or 20 or 21 or 22
24. distress\*.mp.

25. Stress, Psychological/
26. Anxiety/ or exp Anxiety Disorders/
27. Depression/
28. depress\*.mp.
29. exp Depressive Disorder/
30. Dysthymic Disorder/
31. Adjustment Disorders/
32. "Quality of Life"/
33. psychosocial.mp.
34. Depressive Disorder, Major/
35. 24 or 25 or 26 or 27 or 28 or 29 or 30 or 31 or 32 or 33 or 34
36. (psychosocial adj3 (care\* or support\* or service\*)).mp.
37. Counseling/
38. (psychological adj3 (support\* or care\* or service\* or therap\* or intervention\*)).mp.
39. exp Psychotherapy/
40. Mental Health Services/
41. (psycho oncology or psychooncology).mp.
42. Supportive care.mp.
43. Support service\*.mp.
44. Social Support/
45. 36 or 37 or 38 or 39 or 40 or 41 or 42 or 43 or 44
46. Intervention Studies/
47. implement\*.mp.
48. disseminat\*.mp.
49. adopt\*.mp.

- 50. practice\*.mp.
- 51. organizational change\*.mp.
- 52. diffusion.mp.
- 53. system\* change\*.mp.
- 54. quality improvement\*.mp.
- 55. transform\*.mp.
- 56. translat\*.mp.
- 57. transfer\*.mp.
- 58. uptake\*.mp.
- 59. sustainab\*.mp.
- 60. institutional\*.mp.
- 61. routin\*.mp.
- 62. maintenance.mp.
- 63. capacity.mp.
- 64. incorporat\*.mp.
- 65. adher\*.mp.
- 66. program\*.mp.
- 67. integrat\*.mp.
- 68. scal\*.mp.
- 69. Randomized Controlled Trial/
- 70. Non randomized controlled trial\*.mp.
- 71. Random Allocation/
- 72. Evaluation Studies/
- 73. Pilot study.mp. or Pilot Projects/
- 74. Evaluation Studies as Topic/

75. Cohort Studies/
76. Controlled Before-After Studies/
77. Historically Controlled Study/
78. Cross-Sectional Studies/
79. (intervention\$ adj5 stud\$).mp.
80. feasibility pilot\*.mp.
81. sequential cohort.mp.
82. Interrupted-time-series stud\*.mp.
83. case series.mp.
84. program\*.mp.
85. intervention\*.mp.
86. Random\*.ab.
87. exp clinical trial/
88. trial.ab.
89. double blind.ab.
90. single blind.ab.
91. experiment\*.mp.
92. (pretest or pre test).mp.
93. (posttest or post test).mp.
94. (pre post or prepost).mp.
95. Before after.mp.
96. (Quasi-randomised or quasi-randomized or quasi-randomized or quazi-randomised).mp.
97. stepped wedge.mp.
98. Comprehensive cohort.mp.

99. Natural experiment.mp.
100. (Quasi experiment or quazi experiments).mp.
101. (Randomised encouragement trial or randomized encouragement trial).mp.
102. (Staggered enrolment trial or staggered enrollment trial).mp.
103. (Nonrandomised or non randomised or nonrandomized or non randomized).mp.
104. Interrupted time series.mp.
105. (Time series and trial).mp.
106. Multiple baseline.mp.
107. 46 or 47 or 48 or 49 or 50 or 51 or 52 or 53 or 54 or 55 or 56 or 57 or 58 or 59 or 60 or 61 or 62 or 63 or 64 or 65 or 66 or 67 or 68 or 69 or 70 or 71 or 72 or 73 or 74 or 75 or 76 or 77 or 78 or 79 or 80 or 81 or 82 or 83 or 84 or 85 or 86 or 87 or 88 or 89 or 90 or 91 or 92 or 93 or 94 or 95 or 96 or 97 or 98 or 99 or 100 or 101 or 102 or 103 or 104 or 105 or 106
108. 15 and 23 and 35 and 45 and 107
109. psychology.mp. or Psychology/
110. social work\*.mp.
111. 45 or 109 or 110
112. 15 and 23 and 35 and 107 and 111
